# Supplementary material for: Humoral immune response to tick-borne encephalitis vaccination in allogeneic blood and marrow graft recipients
Source: PubMed Central journal article supplement (PMC7381595; doi:10.1038/s41541-020-00215-1), 2020-07-24
Supplement: 41541_2020_215_MOESM1_ESM.pdf [file 41541_2020_215_MOESM1_ESM.pdf]

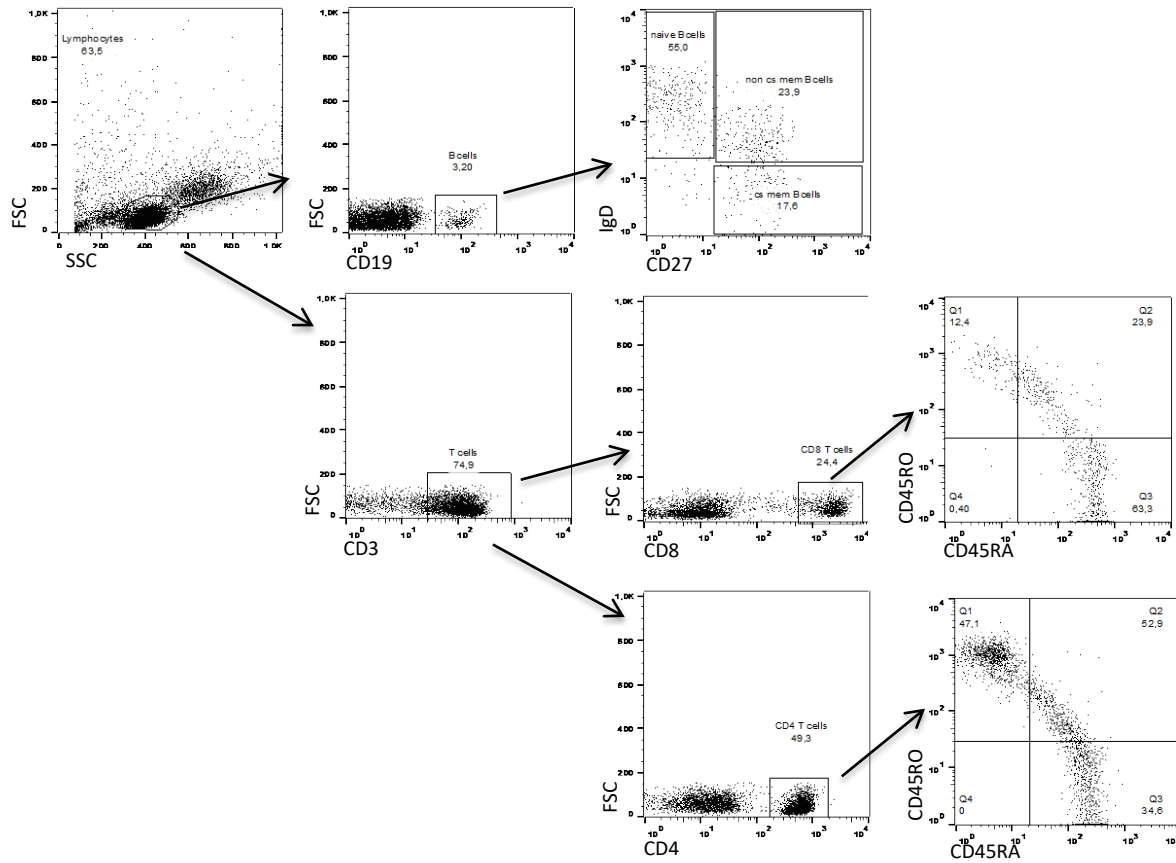

**Supplementary Figure 1. FACS gating strategy**

Lymphocytes were identified by FSC/SSC analysis from MNC (mononuclear cells). Within the lymphocyte gate D19 PerCP was used to identify B-cells. Memory B-cells were characterized as CD19 CD27 positive subset and further classified as class-switched or non-class-switched by IgD membrane expression. CD3 PerCP was used to identify T-cells within the lymphocyte gate. T-cells were further divided into CD8 and CD4 T-cells using APC labeled antibodies. CD4 and CD8 were further analysed based on their CD45RA and CD45RO expression.
